# Supplementary material
Source: PubMed Central journal article supplement (PMC6449178)
Supplement: NIHMS1517495-supplement-3.pdf [file NIHMS1517495-supplement-3.pdf]

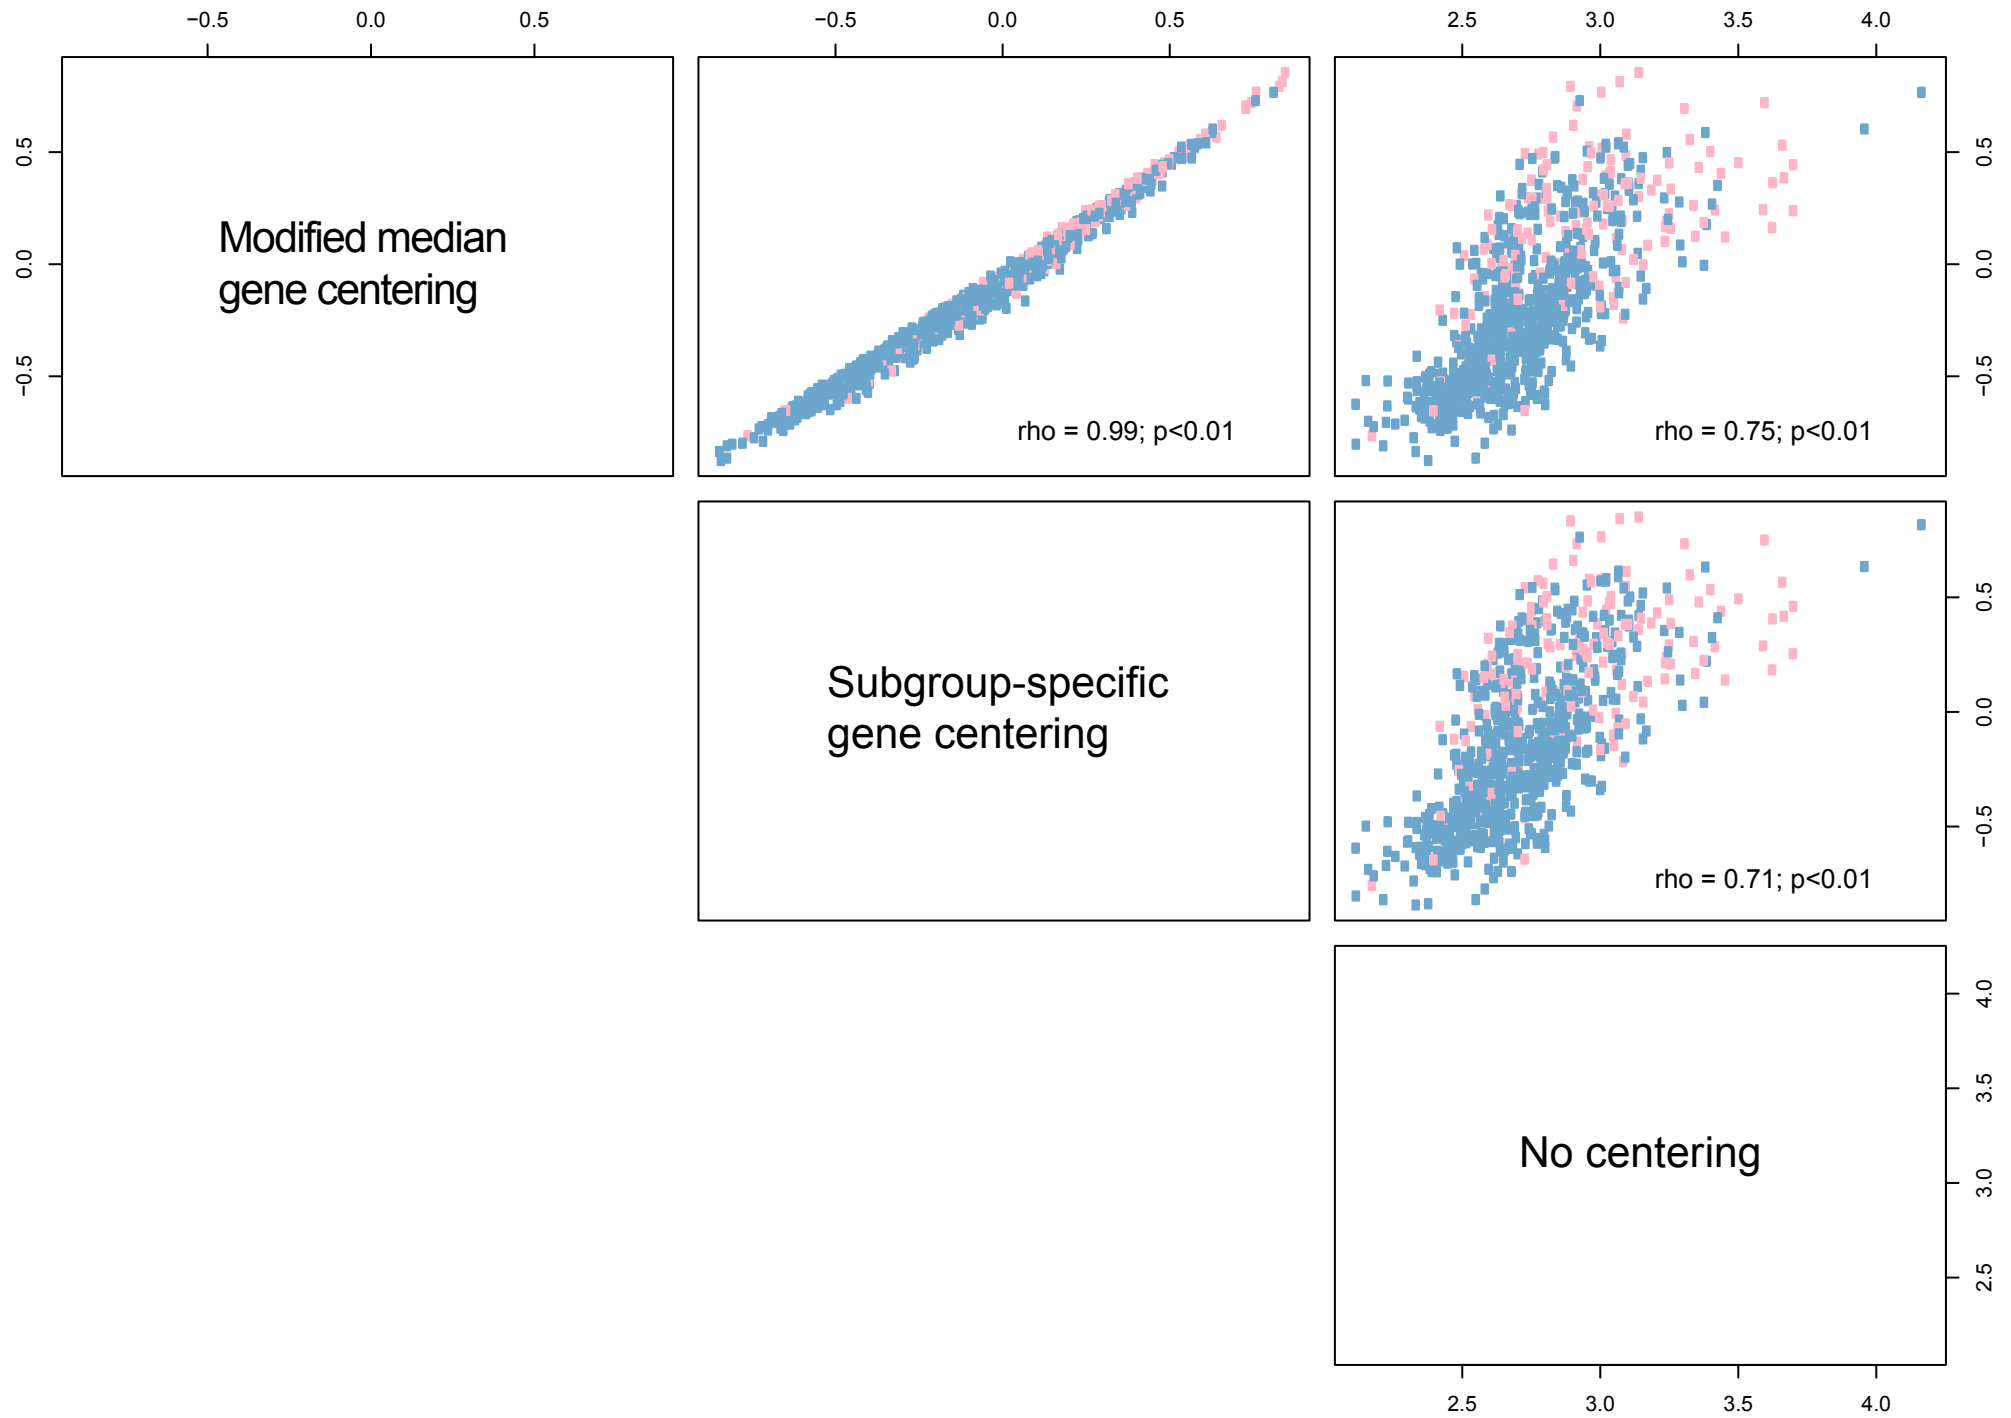

**Supplementary Figure S2.** Proliferation scores of tumors were highly correlated between simple  $\text{Log}_2$  expression (no centering) and each pre-processing method. The blue dots represent cases that are estrogen receptor positive; pink dots represent cases that are estrogen receptor negative.
