# Supplementary material
Source: PubMed Central journal article supplement (PMC6449178)
Supplement: NIHMS1517495-supplement-4.pdf [file NIHMS1517495-supplement-4.pdf]

A. RFS and PAM50 (modified median gene centering)

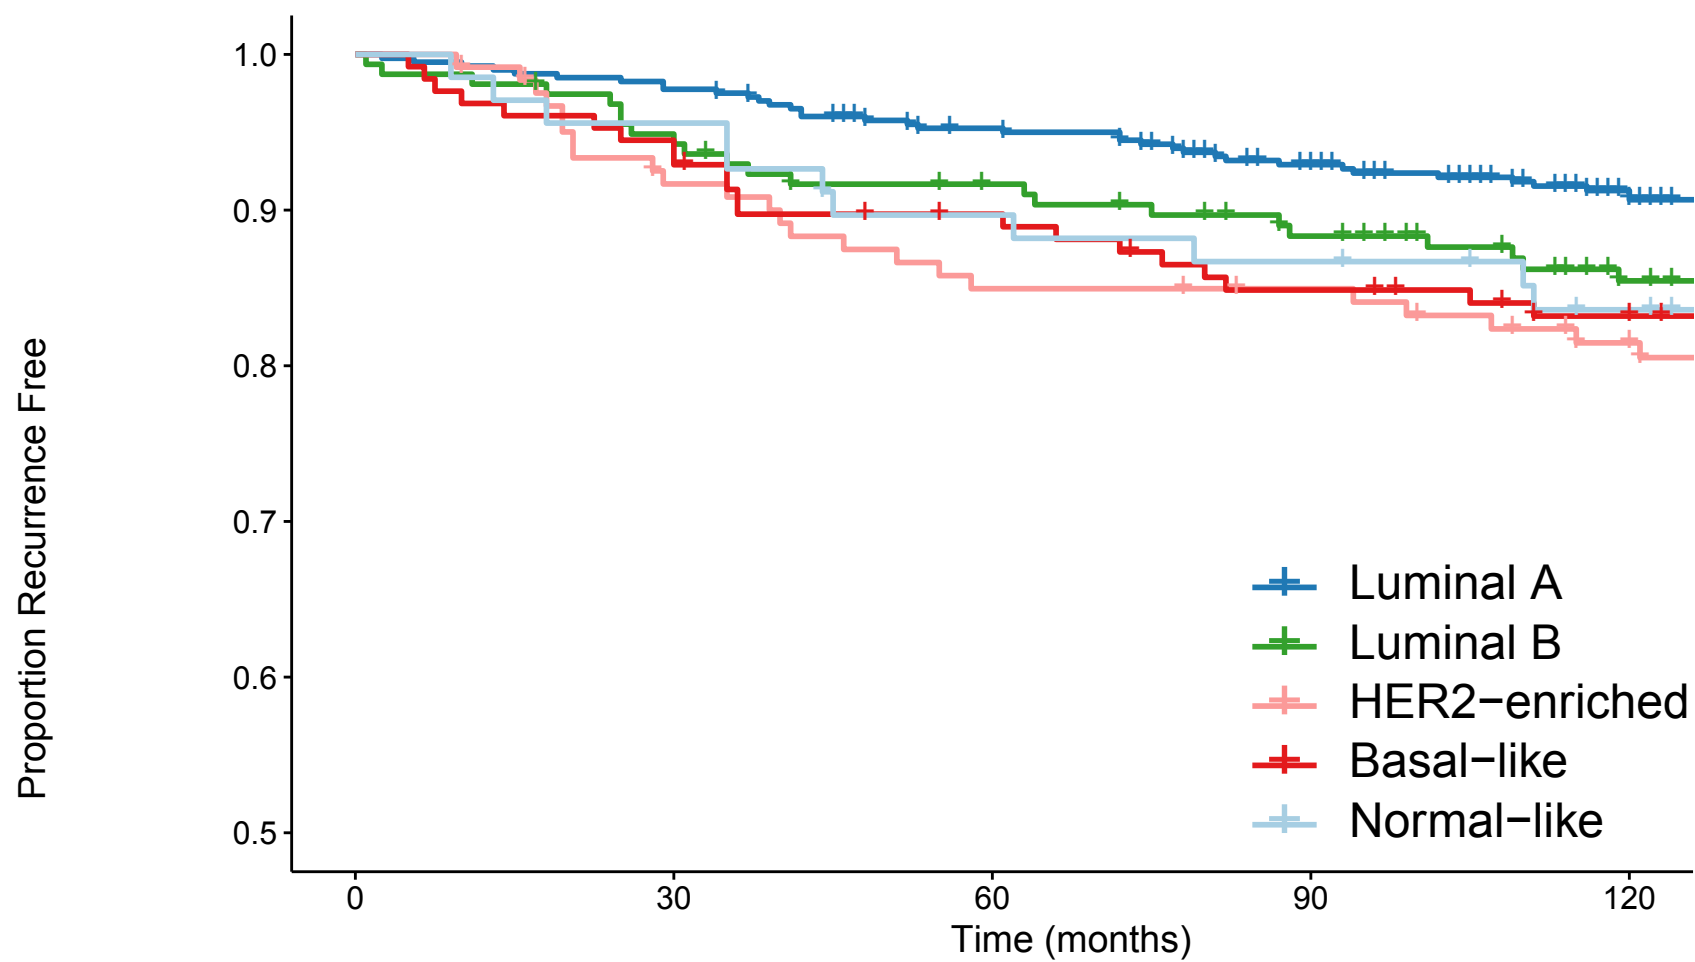

Number at risk

|               | 0   | 30  | 60  | 90  | 120 |
|---------------|-----|-----|-----|-----|-----|
| Luminal A     | 402 | 393 | 373 | 347 | 309 |
| Luminal B     | 157 | 148 | 139 | 130 | 114 |
| HER2-enriched | 122 | 109 | 101 | 99  | 87  |
| Basal-like    | 127 | 120 | 111 | 104 | 98  |
| Normal-like   | 68  | 65  | 60  | 58  | 53  |

Time (months)

B. DRFS and PAM50 (modified median gene centering)

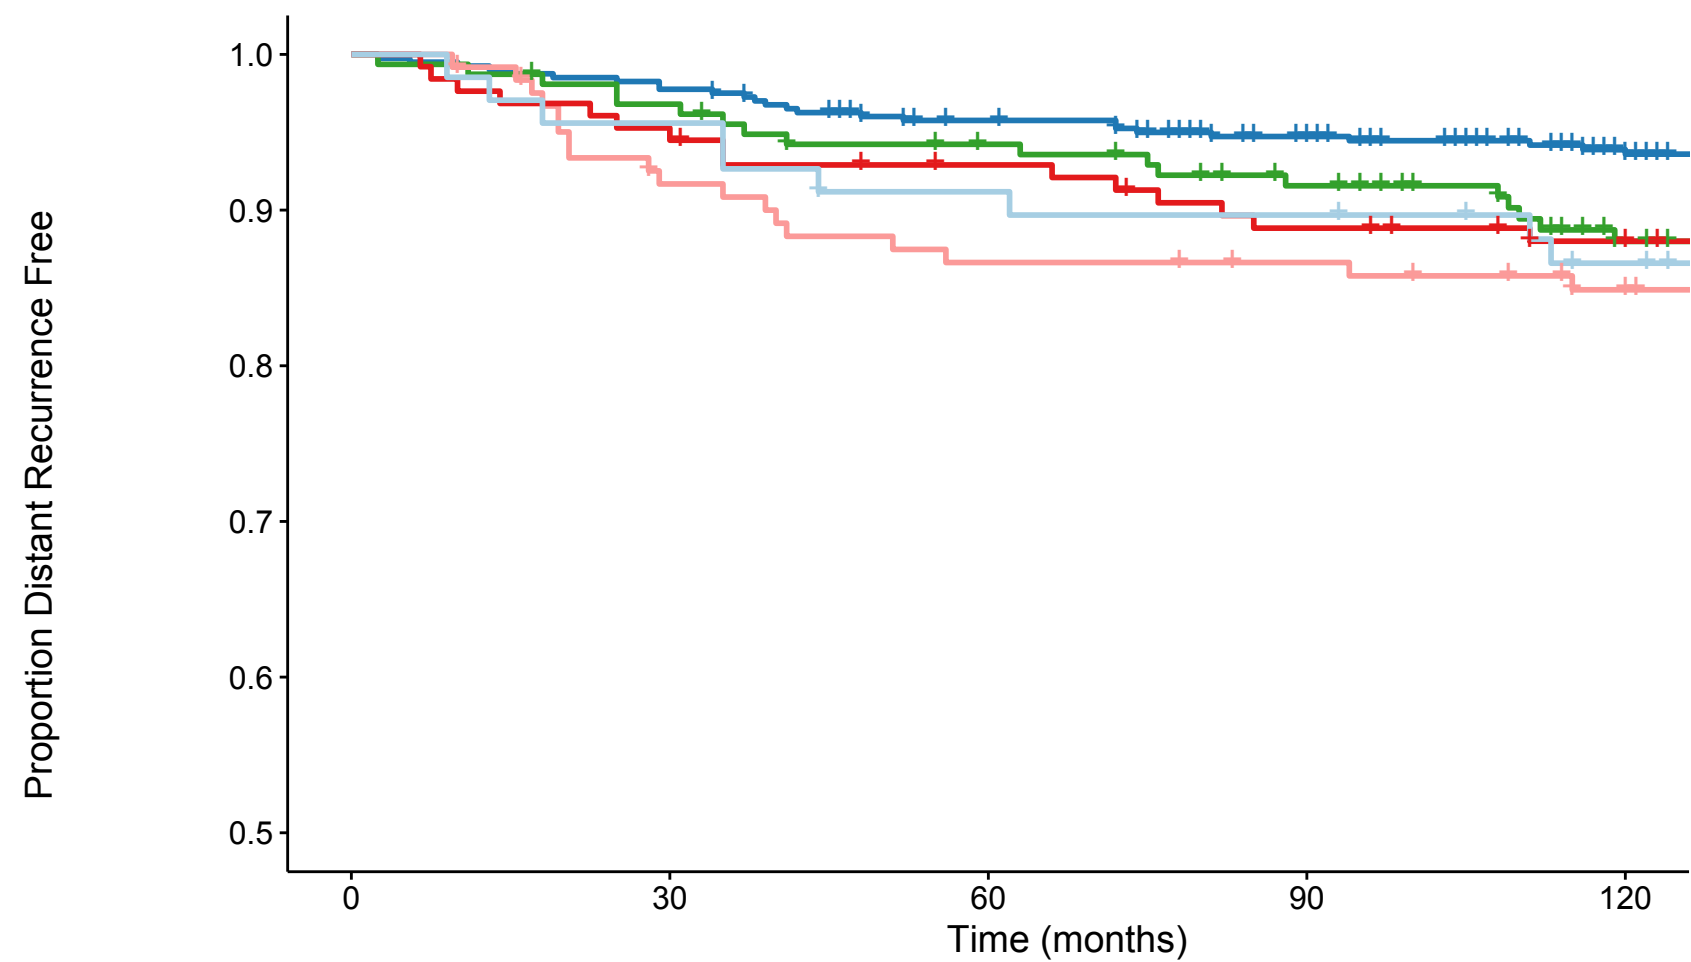

Number at risk

|               | 0   | 30  | 60  | 90  | 120 |
|---------------|-----|-----|-----|-----|-----|
| Luminal A     | 402 | 393 | 375 | 354 | 319 |
| Luminal B     | 157 | 151 | 143 | 135 | 118 |
| HER2-enriched | 122 | 109 | 103 | 101 | 91  |
| Basal-like    | 127 | 121 | 115 | 109 | 104 |
| Normal-like   | 68  | 65  | 61  | 60  | 55  |

Time (months)

C. RFS and PAM50 (subgroup-specific gene centering)

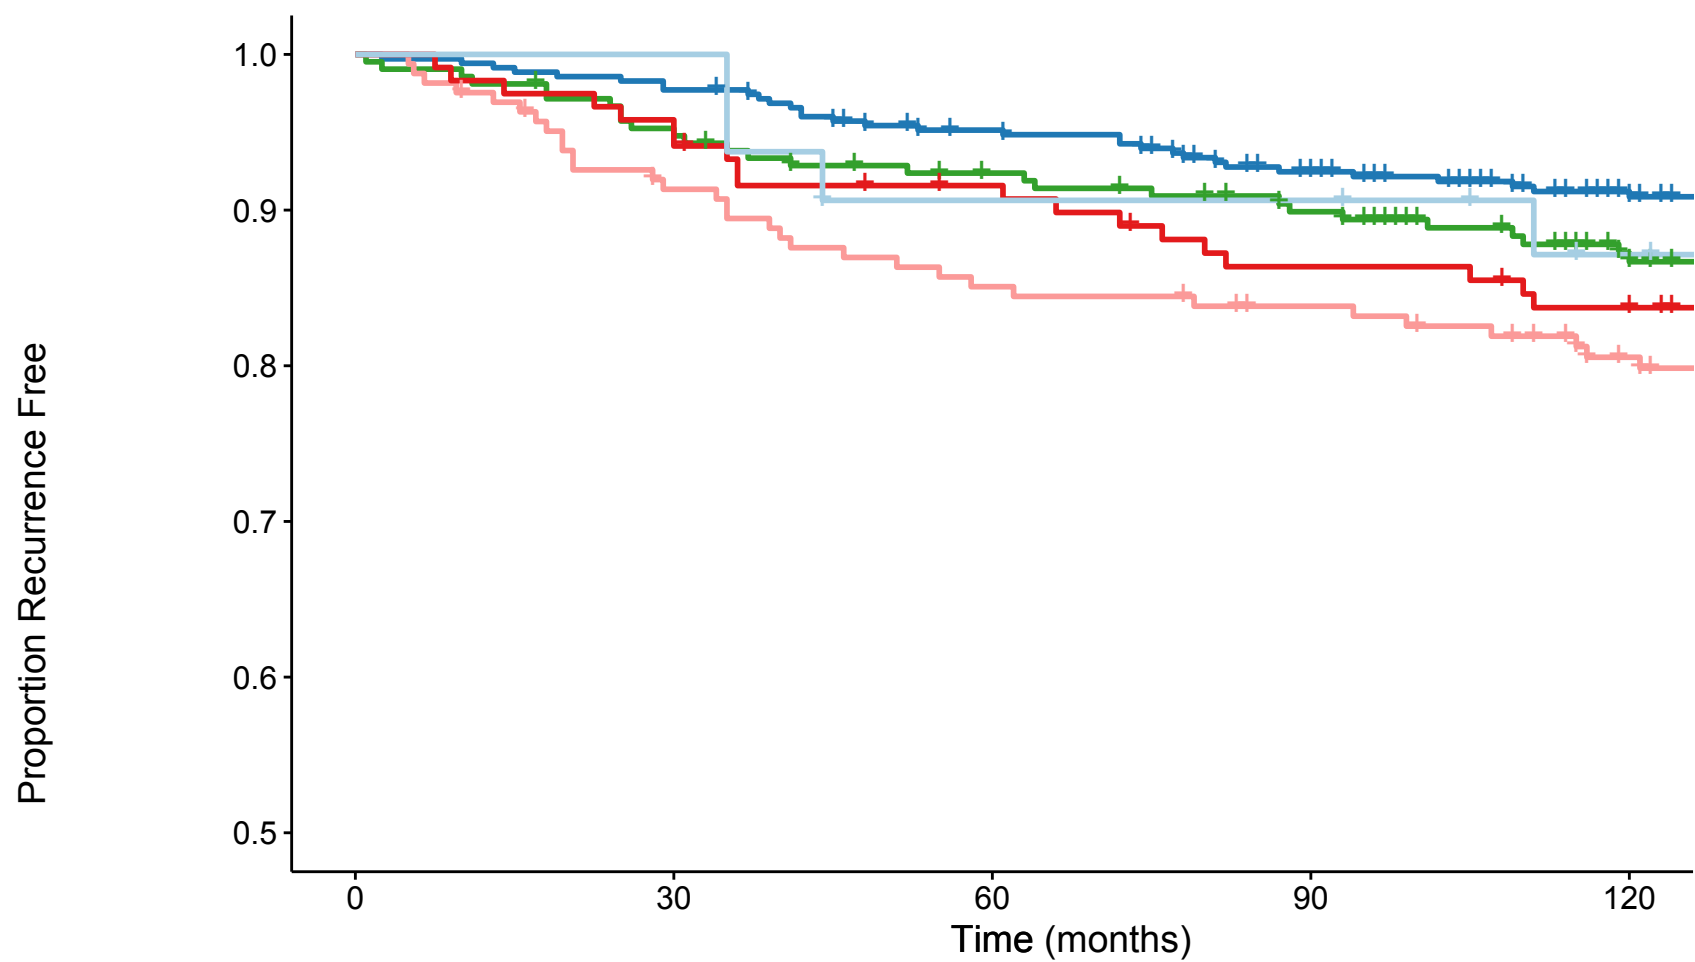

Number at risk

|               | 0   | 30  | 60  | 90  | 120 |
|---------------|-----|-----|-----|-----|-----|
| Luminal A     | 351 | 343 | 325 | 302 | 271 |
| Luminal B     | 211 | 200 | 189 | 178 | 156 |
| HER2-enriched | 163 | 146 | 136 | 131 | 115 |
| Basal-like    | 119 | 114 | 106 | 99  | 95  |
| Normal-like   | 32  | 32  | 28  | 28  | 24  |

Time (months)

D. DRFS and PAM50 (subgroup-specific gene centering)

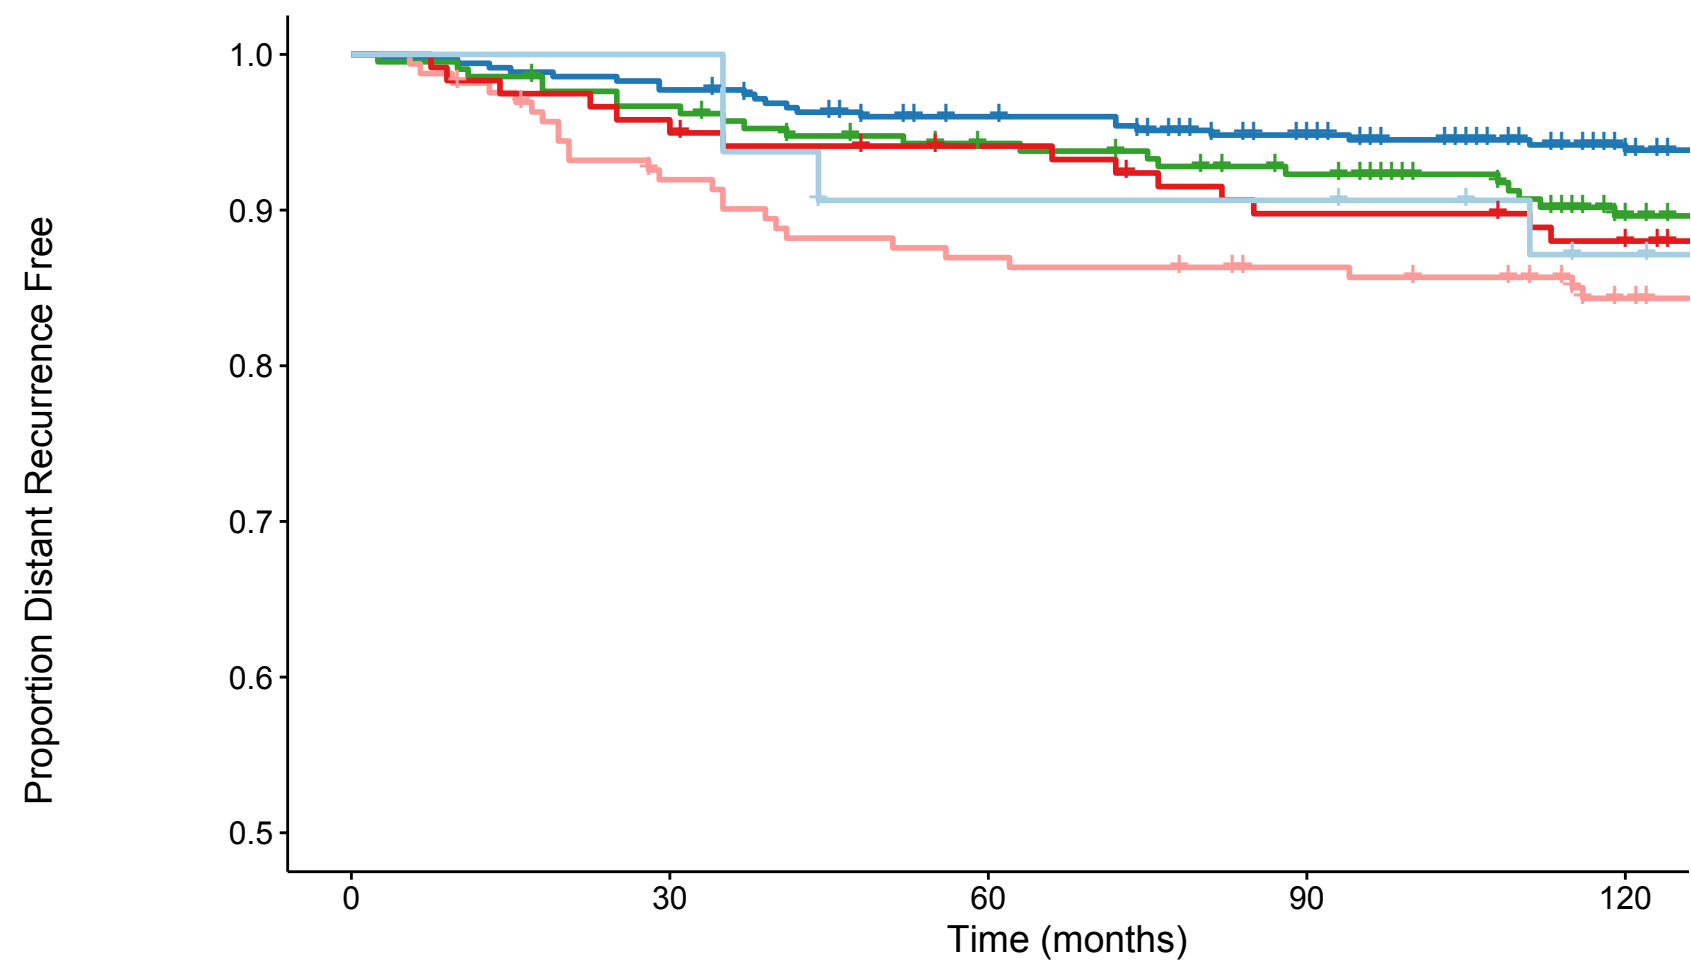

Number at risk

|               | 0   | 30  | 60  | 90  | 120 |
|---------------|-----|-----|-----|-----|-----|
| Luminal A     | 351 | 343 | 328 | 310 | 281 |
| Luminal B     | 211 | 203 | 193 | 183 | 161 |
| HER2-enriched | 163 | 147 | 139 | 135 | 121 |
| Basal-like    | 119 | 114 | 109 | 103 | 100 |
| Normal-like   | 32  | 32  | 28  | 28  | 24  |

Time (months)

**Supplementary Figure S3.** These Kaplan-Meier curves display the relationships between tumor PAM50 subtypes and recurrence-free survival (RFS) or distant recurrence-free survival (DRFS) in the Nurses' Health Studies. PAM50 subtyping was separately obtained computed using the modified median (**A** and **B**) and subgroup-specific (**C** and **D**) gene centering methods. The blue lines represent Luminal A (tumor); green lines represent Luminal B (tumor); pink lines represent HER2-enriched (tumor); red lines represent Basal-like (tumor); and light blue lines represent Normal-like (tumor).
